# Supplementary material
Source: Springer Nature journal article supplement (https://www.springermedizin.de/resource/supplementary/12885_2009_2075_MOESM6_ESM.pdf/9460454)

**A**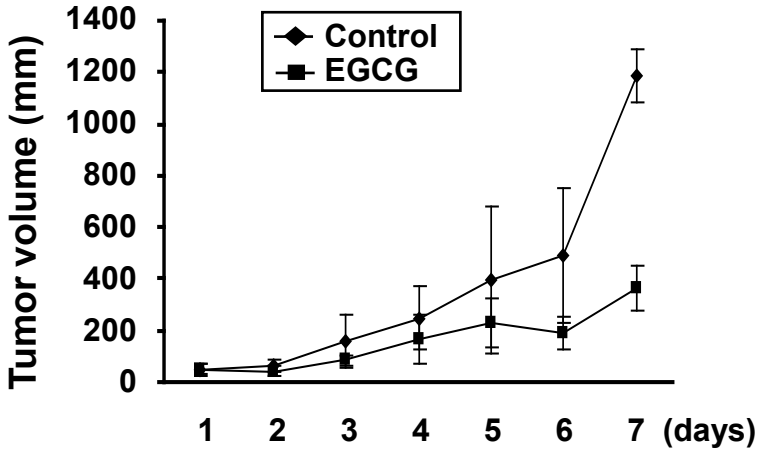**B**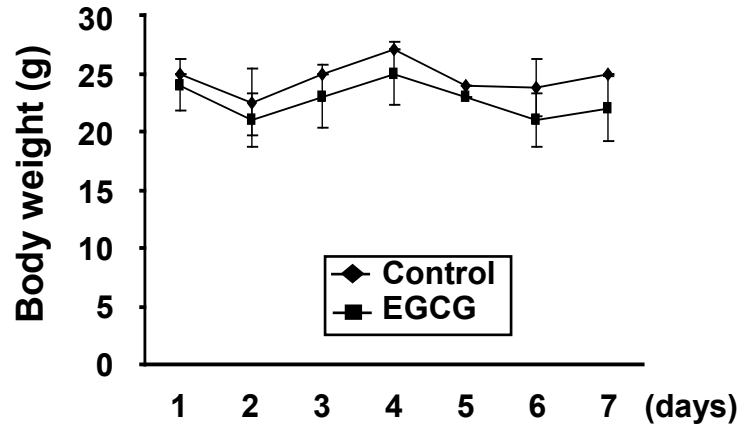**C**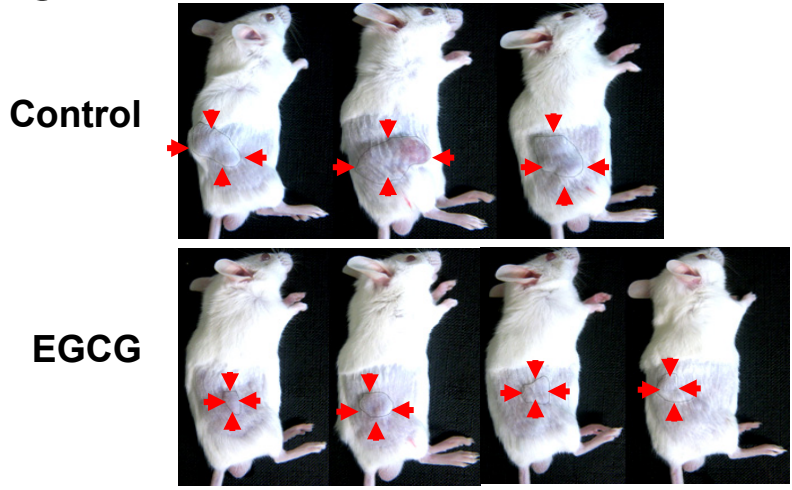

Supplement: MOESM6 [file 9460454]
